# Supplementary material for: A Zinc-Bcat Compound: Unlocking New and Diverse Reactivity Pathways Beyond Nucleophilic Borylation
Source: Research Square preprint supplement (doi:10.21203/rs.3.rs-5335104/v1), 2024-11-07

## checkCIF/PLATON report

Structure factors have been supplied for datablock(s) znbcatdmap\_a

THIS REPORT IS FOR GUIDANCE ONLY. IF USED AS PART OF A REVIEW PROCEDURE FOR PUBLICATION, IT SHOULD NOT REPLACE THE EXPERTISE OF AN EXPERIENCED CRYSTALLOGRAPHIC REFEREE.

No syntax errors found. CIF dictionary Interpreting this report

**Datablock: znbcatsmap\_a**

|                 |                |                    |               |
|-----------------|----------------|--------------------|---------------|
| Bond precision: | C-C = 0.0043 Å | Wavelength=1.54178 |               |
| Cell:           | a=12.6072 (4)  | b=19.2243 (8)      | c=16.2759 (6) |
|                 | alpha=90       | beta=94.982 (3)    | gamma=90      |
| Temperature:    | 100 K          |                    |               |

|                        | Calculated         | Reported           |
|------------------------|--------------------|--------------------|
| Volume                 | 3929.8(3)          | 3929.8(3)          |
| Space group            | P 21/c             | P 1 21/c 1         |
| Hall group             | -P 2ybc            | -P 2ybc            |
| Moiety formula         | C42 H55 B N4 O2 Zn | C42 H55 B N4 O2 Zn |
| Sum formula            | C42 H55 B N4 O2 Zn | C42 H55 B N4 O2 Zn |
| Mr                     | 724.10             | 724.08             |
| Dx, g cm <sup>-3</sup> | 1.224              | 1.224              |
| Z                      | 4                  | 4                  |
| Mu (mm <sup>-1</sup> ) | 1.165              | 1.165              |
| F000                   | 1544.0             | 1544.0             |
| F000'                  | 1541.48            |                    |
| h, k, lmax             | 15, 23, 20         | 15, 23, 19         |
| Nref                   | 7785               | 7541               |
| Tmin, Tmax             | 0.932, 0.966       | 0.474, 0.754       |
| Tmin'                  | 0.900              |                    |

```
Correction method= # Reported T Limits: Tmin=0.474 Tmax=0.754
AbsCorr = NONE
```

Data completeness= 0.969                      Theta (max)= 72.380

```
R(reflections)= 0.0524( 5546)      wR2(reflections)=
S = 1.021                        0.1363( 7541)
Npar= 523
```

---

The following ALERTS were generated. Each ALERT has the format

**test-name\_ALERT\_alert-type\_alert-level.**

Click on the hyperlinks for more details of the test.

---

### Alert level C

|                   |                                           |                              |           |                   |          |           |            |
|-------------------|-------------------------------------------|------------------------------|-----------|-------------------|----------|-----------|------------|
| PLAT220_ALERT_2_C | NonSolvent                                | Resd 1                       | C         | Ueq(max)/Ueq(min) | Range    | 3.5       | Ratio      |
| PLAT767_ALERT_4_C | INS Embedded LIST 6                       | Instruction Should be LIST 4 |           |                   |          | Please    | Check      |
| PLAT906_ALERT_3_C | Large K Value in the Analysis of Variance | .....                        |           |                   |          | 4.488     | Check      |
| PLAT911_ALERT_3_C | Missing FCF Refl Between Thmin & STh/L=   | 0.600                        |           |                   |          | 98        | Report     |
|                   | -12 14 1,                                 | 11 15 1,                     | -12 14 2, | 11 15 2,          | 10 16 2, | 12 13 3,  |            |
|                   | 11 14 3,                                  | 10 15 3,                     | 11 15 3,  | 9 16 3,           | 11 14 4, | 8 15 4,   |            |
|                   | 9 15 4,                                   | 10 15 4,                     | 7 16 4,   | 8 16 4,           | 8 15 5,  | 9 15 5,   |            |
|                   | -8 2 7,                                   | 10 10 7,                     | 10 10 8,  | 9 11 8,           | 10 10 9, | 9 14 9,   |            |
|                   | 9 9 10,                                   | 8 10 10,                     | 9 10 10,  | 8 11 10,          | 9 11 10, | 8 12 10,  |            |
|                   | 9 13 10,                                  | 8 14 10,                     | 7 15 10,  | 9 8 11,           | 9 9 11,  | 8 10 11,  |            |
|                   | 9 10 11,                                  | 8 11 11,                     | 9 11 11,  | 8 12 11,          | 7 13 11, | 8 13 11,  |            |
|                   | 7 14 11,                                  | 6 15 11,                     | 6 16 11,  | 9 7 12,           | 9 8 12,  | 9 9 12,   |            |
|                   | 8 10 12,                                  | 9 10 12,                     | 8 11 12,  | 7 12 12,          | 8 12 12, | 7 13 12,  |            |
|                   | 6 14 12,                                  | -8 9 13,                     | 8 9 13,   | 8 10 13,          | 7 12 13, | -8 13 13, |            |
|                   | -7 14 13,                                 | 8 8 14,                      | -7 13 14, | -6 12 15,         | 4 0 16,  | -6 10 16, |            |
|                   | -6 8 17,                                  | -5 8 17,                     | -5 9 17,  | -7 0 18,          | -6 0 18, | -5 0 18,  |            |
|                   | -4 0 18,                                  | -3 0 18,                     | -6 1 18,  | -5 1 18,          | -4 1 18, | -3 1 18,  |            |
|                   | -5 2 18,                                  | -4 2 18,                     | -5 3 18,  | -4 3 18,          | -5 4 18, | -4 4 18,  |            |
|                   | -6 5 18,                                  | -5 5 18,                     | -4 5 18,  | -5 6 18,          | -4 6 18, | -4 7 18,  |            |
|                   | -4 1 19,                                  | -3 1 19,                     | -2 1 19,  | -4 2 19,          | -3 2 19, | -4 3 19,  |            |
| PLAT977_ALERT_2_C | Check Negative Difference Density on H49A |                              |           |                   |          | .         | -0.34 eA-3 |

---

### Alert level G

|                   |                                                            |        |        |
|-------------------|------------------------------------------------------------|--------|--------|
| PLAT003_ALERT_2_G | Number of Uiso or U(i,j) Restrained non-H Atoms            | 12     | Report |
| PLAT178_ALERT_4_G | The CIF-Embedded .res File Contains SIMU Records           | 1      | Report |
| PLAT188_ALERT_3_G | A Non-default SIMU Restraint Value has been used           | 0.0100 | Report |
| PLAT301_ALERT_3_G | Main Residue Disorder .....(Resd 1)                        | 12%    | Note   |
| PLAT380_ALERT_4_G | Incorrectly? Oriented X(sp2)-Methyl Moiety .....           | C13    | Check  |
| PLAT395_ALERT_2_G | Deviating X-O-Y Angle From 120 for O1                      | 106.8  | Degree |
| PLAT395_ALERT_2_G | Deviating X-O-Y Angle From 120 for O2                      | 107.5  | Degree |
| PLAT412_ALERT_2_G | Short Intra XH3 .. XHn H37 ..H34A                          | 2.09   | Ang.   |
|                   | x,y,z =                                                    | 1_555  | Check  |
| PLAT860_ALERT_3_G | Number of Least-Squares Restraints .....                   | 108    | Note   |
| PLAT883_ALERT_1_G | No Info/Value for _atom_sites_solution_primary             | Please | Do !   |
| PLAT912_ALERT_4_G | Missing # of FCF Reflections Above STh/L= 0.600            | 137    | Note   |
| PLAT941_ALERT_3_G | Average HKL Measurement Multiplicity .....                 | 2.9    | Low    |
| PLAT969_ALERT_5_G | The 'Henn et al.' R-Factor-gap value .....                 | 1.500  | Note   |
|                   | Predicted wR2: Based on SigI**2 9.09 or SHELX Weight 13.35 |        |        |
| PLAT978_ALERT_2_G | Number C-C Bonds with Positive Residual Density.           | 1      | Info   |

---

- 0 **ALERT level A** = Most likely a serious problem - resolve or explain  
0 **ALERT level B** = A potentially serious problem, consider carefully  
5 **ALERT level C** = Check. Ensure it is not caused by an omission or oversight  
14 **ALERT level G** = General information/check it is not something unexpected

1 ALERT type 1 CIF construction/syntax error, inconsistent or missing data

7 ALERT type 2 Indicator that the structure model may be wrong or deficient  
6 ALERT type 3 Indicator that the structure quality may be low  
4 ALERT type 4 Improvement, methodology, query or suggestion  
1 ALERT type 5 Informative message, check

---

---

It is advisable to attempt to resolve as many as possible of the alerts in all categories. Often the minor alerts point to easily fixed oversights, errors and omissions in your CIF or refinement strategy, so attention to these fine details can be worthwhile. In order to resolve some of the more serious problems it may be necessary to carry out additional measurements or structure refinements. However, the purpose of your study may justify the reported deviations and the more serious of these should normally be commented upon in the discussion or experimental section of a paper or in the "special\_details" fields of the CIF. checkCIF was carefully designed to identify outliers and unusual parameters, but every test has its limitations and alerts that are not important in a particular case may appear. Conversely, the absence of alerts does not guarantee there are no aspects of the results needing attention. It is up to the individual to critically assess their own results and, if necessary, seek expert advice.

### **Publication of your CIF in IUCr journals**

A basic structural check has been run on your CIF. These basic checks will be run on all CIFs submitted for publication in IUCr journals (*Acta Crystallographica*, *Journal of Applied Crystallography*, *Journal of Synchrotron Radiation*); however, if you intend to submit to *Acta Crystallographica Section C* or *E* or *IUCrData*, you should make sure that full publication checks are run on the final version of your CIF prior to submission.

### **Publication of your CIF in other journals**

Please refer to the *Notes for Authors* of the relevant journal for any special instructions relating to CIF submission.

---

**PLATON version of 22/08/2024; check.def file version of 21/08/2024**

Datablock znbcatdmap\_a - ellipsoid plot

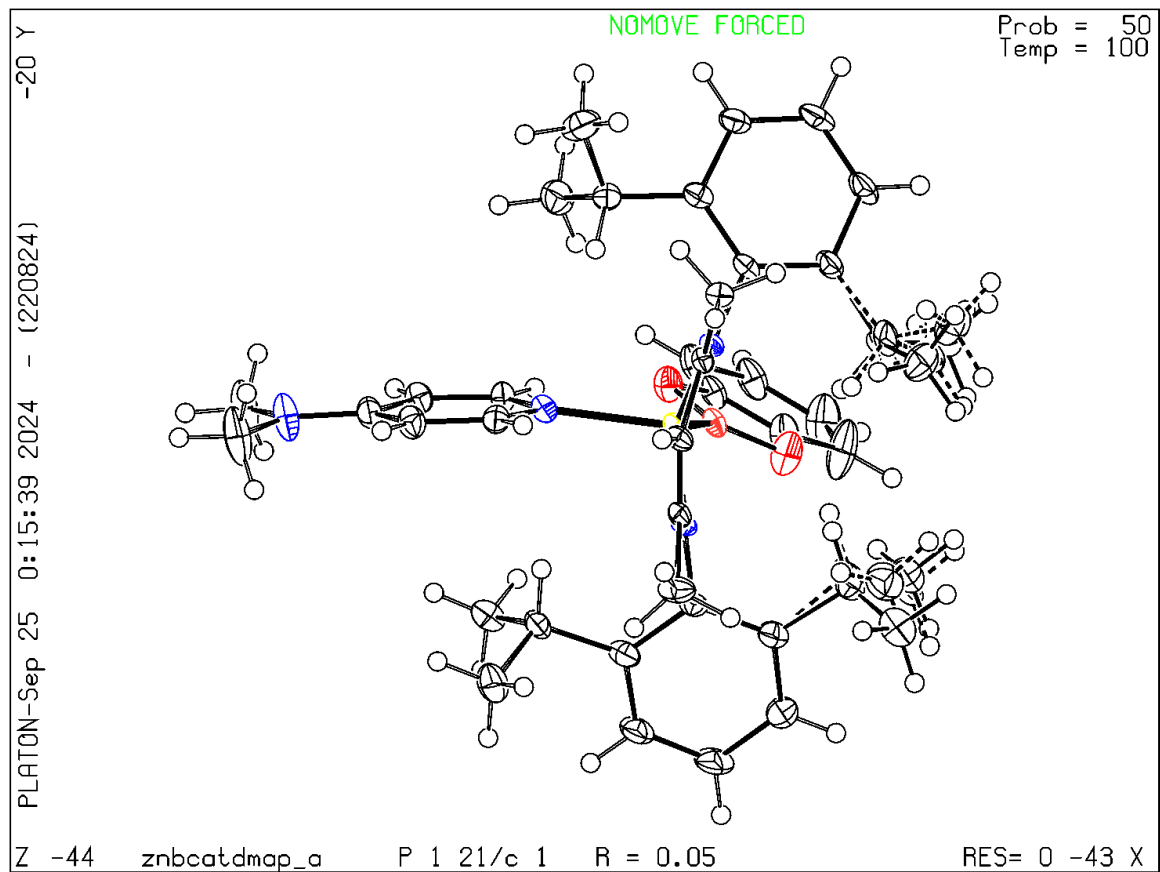

Supplement: Supplementary file 3 [file 3d71d98925c0e329bb3d1ffb.pdf]
