# Supplementary material for: A Zinc-Bcat Compound: Unlocking New and Diverse Reactivity Pathways Beyond Nucleophilic Borylation
Source: Research Square preprint supplement (doi:10.21203/rs.3.rs-5335104/v1), 2024-11-07

## checkCIF/PLATON report

Structure factors have been supplied for datablock(s) xgph2n2\_zn\_0m\_5

THIS REPORT IS FOR GUIDANCE ONLY. IF USED AS PART OF A REVIEW PROCEDURE FOR PUBLICATION, IT SHOULD NOT REPLACE THE EXPERTISE OF AN EXPERIENCED CRYSTALLOGRAPHIC REFEREE.

No syntax errors found.      CIF dictionary      Interpreting this report

### Datablock: xgph2n2\_zn\_0m\_5

---

Bond precision:      C-C = 0.0041 Å      Wavelength=1.54178

Cell:                  a=10.9759(13)          b=11.303(3)          c=19.281(4)  
                         alpha=100.700(13)      beta=91.091(9)      gamma=108.195(15)

Temperature:      100 K

|                        | Calculated                      | Reported                  |
|------------------------|---------------------------------|---------------------------|
| Volume                 | 2225.3(8)                       | 2225.4(8)                 |
| Space group            | P -1                            | P -1                      |
| Hall group             | -P 1                            | -P 1                      |
| Moiety formula         | C47 H55 B N4 O2 Zn, 0.5(C6 H14) | C47 H55 B N4 O2 Zn, C3 H7 |
| Sum formula            | C50 H62 B N4 O2 Zn              | C50 H62 B N4 O2 Zn        |
| Mr                     | 827.24                          | 827.21                    |
| Dx, g cm <sup>-3</sup> | 1.235                           | 1.234                     |
| Z                      | 2                               | 2                         |
| Mu (mm <sup>-1</sup> ) | 1.094                           | 1.093                     |
| F000                   | 882.0                           | 882.0                     |
| F000'                  | 881.02                          |                           |
| h, k, lmax             | 13, 13, 23                      | 13, 13, 23                |
| Nref                   | 8164                            | 7964                      |
| Tmin, Tmax             | 0.937, 0.957                    | 0.411, 0.652              |
| Tmin'                  | 0.858                           |                           |

Correction method= # Reported T Limits: Tmin=0.411 Tmax=0.652  
AbsCorr = MULTI-SCAN

Data completeness= 0.976      Theta(max)= 68.283

R(reflections)= 0.0403( 7434)

wR2(reflections)=  
0.1001( 7964)

S = 1.071

Npar= 535

---

The following ALERTS were generated. Each ALERT has the format

**test-name\_ALERT\_alert-type\_alert-level.**

Click on the hyperlinks for more details of the test.

---

### Alert level C

PLAT029\_ALERT\_3\_C \_diffn\_measured\_fraction\_theta\_full value Low . 0.978 Why?  
PLAT042\_ALERT\_1\_C Calc. and Reported MoietyFormula Strings Differ Please Check  
Calc: C47 H55 B N4 O2 Zn, 0.5(C6 H14)  
Rep.: C47 H55 B N4 O2 Zn, C3 H7  
PLAT766\_ALERT\_4\_C INS Embedded LIST 8 Instruction Should be LIST 4 Please Check  
PLAT911\_ALERT\_3\_C Missing FCF Refl Between Thmin & STh/L= 0.600 180 Report  
-1 3 0, -12 9 0, -11 9 0, -11 10 0, -2 13 0, 11-10 1,  
12 -9 1, -13 3 1, -13 6 1, -12 8 1, -11 10 1, 11-10 2,  
11 -9 2, 12 -9 2, -1 0 2, -13 3 2, -13 4 2, -13 5 2,  
-12 8 2, -11 10 2, 11-10 3, 12 -9 3, -13 3 3, -13 4 3,  
-13 5 3, -12 6 3, -12 8 3, -11 10 3, -5 10 3, -12 1 4,  
-12 2 4, -12 3 4, -13 4 4, -12 6 4, -12 8 4, 4 10 4,  
-12 -1 5, -12 0 5, -12 1 5, -12 2 5, -12 4 5, -12 6 5,  
5 9 5, 12 -1 6, -12 0 6, -12 1 6, -11 1 6, -12 2 6,  
-11 2 6, -12 3 6, -11 3 6, -12 4 6, -12 5 6, -12 6 6,  
-12 7 6, 6 8 6, -1 -4 7, -11 -3 7, -11 -2 7, -11 -1 7,  
-8 -1 7, -12 0 7, -11 0 7, -10 0 7, -12 1 7, -11 1 7,  
-10 1 7, -12 2 7, -11 2 7, -12 3 7, -11 3 7, -12 4 7,  
-11 4 7, -12 5 7, -12 6 7, -9 8 7, -10 -4 8, -10 -3 8,  
-11 -2 8, -10 -2 8, -9 -2 8, -11 -1 8, -10 -1 8, -9 -1 8,  
-12 0 8, -11 0 8, -10 0 8, -12 1 8, -11 1 8, -10 1 8,  
-12 2 8, -11 2 8, -12 3 8, -11 3 8, -12 4 8, -12 5 8,

### Alert level G

PLAT232\_ALERT\_2\_G Hirshfeld Test Diff (M-X) Zn1 --O2 . 5.6 s.u.  
PLAT395\_ALERT\_2\_G Deviating X-O-Y Angle From 120 for O1 . 105.2 Degree  
PLAT794\_ALERT\_5\_G Tentative Bond Valency for Zn1 (II) . 1.85 Info  
PLAT870\_ALERT\_4\_G ALERTS Related to Twinning Effects Suppressed .. ! Info  
PLAT883\_ALERT\_1\_G No Info/Value for \_atom\_sites\_solution\_primary . Please Do !  
PLAT912\_ALERT\_4\_G Missing # of FCF Reflections Above STh/L= 0.600 29 Note  
PLAT913\_ALERT\_3\_G Missing # of Very Strong Reflections in FCF .... 2 Note  
-1 3 0, -1 0 2,  
PLAT931\_ALERT\_5\_G CIFcalcFCF Twin Law ( 0 0 1) Est.d BASF 0.15 Check  
PLAT933\_ALERT\_2\_G Number of HKL-OMIT Records in Embedded .res File 5 Note  
-10 -2 8, -10 0 7, -9 -2 8, -9 -1 8, -5 10 3,  
PLAT941\_ALERT\_3\_G Average HKL Measurement Multiplicity ..... 1.0 Low  
PLAT969\_ALERT\_5\_G The 'Henn et al.' R-Factor-gap value ..... 1.630 Note  
Predicted wR2: Based on SigI\*\*2 6.14 or SHELX Weight 9.35

- 
- 0 **ALERT level A** = Most likely a serious problem - resolve or explain  
0 **ALERT level B** = A potentially serious problem, consider carefully  
4 **ALERT level C** = Check. Ensure it is not caused by an omission or oversight  
11 **ALERT level G** = General information/check it is not something unexpected

2 ALERT type 1 CIF construction/syntax error, inconsistent or missing data

3 ALERT type 2 Indicator that the structure model may be wrong or deficient  
4 ALERT type 3 Indicator that the structure quality may be low  
3 ALERT type 4 Improvement, methodology, query or suggestion  
3 ALERT type 5 Informative message, check

---

---

It is advisable to attempt to resolve as many as possible of the alerts in all categories. Often the minor alerts point to easily fixed oversights, errors and omissions in your CIF or refinement strategy, so attention to these fine details can be worthwhile. In order to resolve some of the more serious problems it may be necessary to carry out additional measurements or structure refinements. However, the purpose of your study may justify the reported deviations and the more serious of these should normally be commented upon in the discussion or experimental section of a paper or in the "special\_details" fields of the CIF. checkCIF was carefully designed to identify outliers and unusual parameters, but every test has its limitations and alerts that are not important in a particular case may appear. Conversely, the absence of alerts does not guarantee there are no aspects of the results needing attention. It is up to the individual to critically assess their own results and, if necessary, seek expert advice.

### **Publication of your CIF in IUCr journals**

A basic structural check has been run on your CIF. These basic checks will be run on all CIFs submitted for publication in IUCr journals (*Acta Crystallographica*, *Journal of Applied Crystallography*, *Journal of Synchrotron Radiation*); however, if you intend to submit to *Acta Crystallographica Section C* or *E* or *IUCrData*, you should make sure that full publication checks are run on the final version of your CIF prior to submission.

### **Publication of your CIF in other journals**

Please refer to the *Notes for Authors* of the relevant journal for any special instructions relating to CIF submission.

---

**PLATON version of 22/08/2024; check.def file version of 21/08/2024**

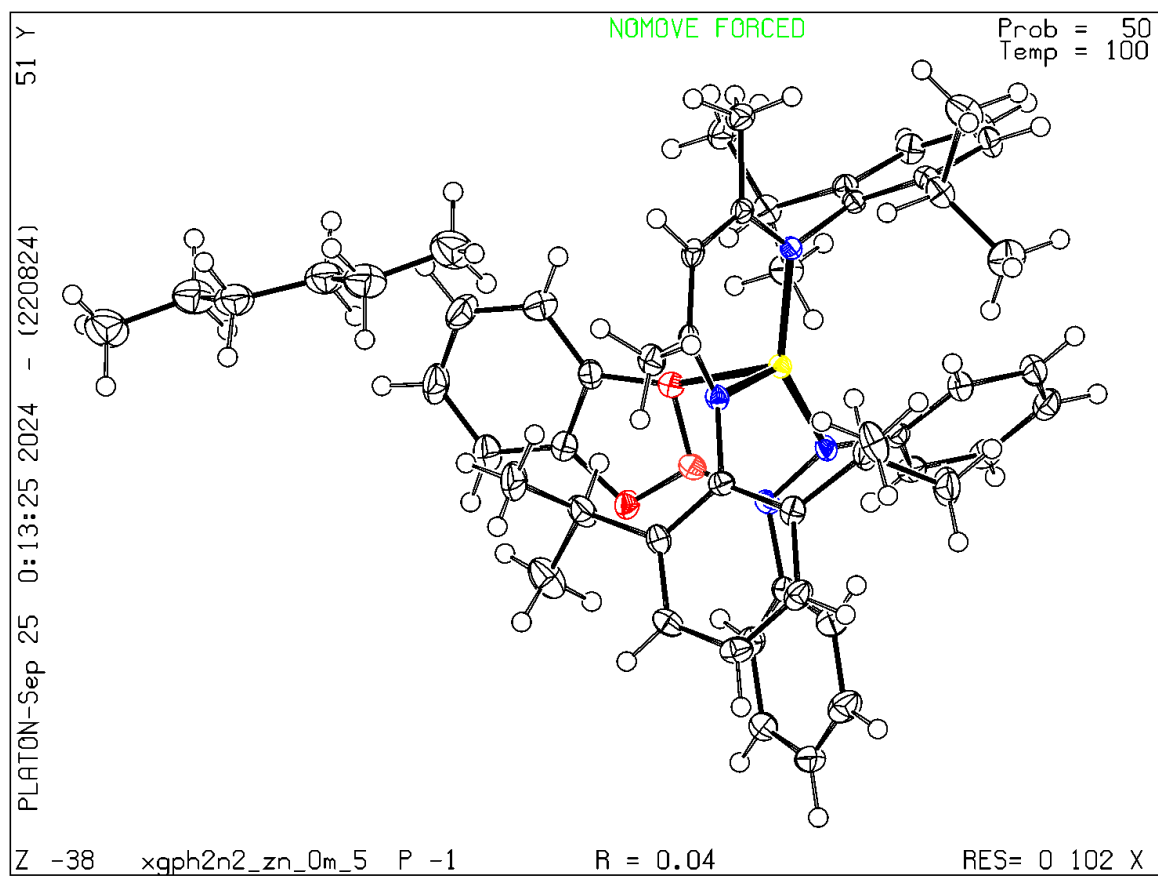

Supplement: Supplementary file 4 [file 4d16f8a4bb01d1b0180b29c5.pdf]
