# Supplementary material for: A Zinc-Bcat Compound: Unlocking New and Diverse Reactivity Pathways Beyond Nucleophilic Borylation
Source: Research Square preprint supplement (doi:10.21203/rs.3.rs-5335104/v1), 2024-11-07

## checkCIF/PLATON report

Structure factors have been supplied for datablock(s) xg\_phcho\_zn\_new\_0m\_a

THIS REPORT IS FOR GUIDANCE ONLY. IF USED AS PART OF A REVIEW PROCEDURE FOR PUBLICATION, IT SHOULD NOT REPLACE THE EXPERTISE OF AN EXPERIENCED CRYSTALLOGRAPHIC REFEREE.

No syntax errors found.      CIF dictionary      Interpreting this report

### Datablock: xg\_phcho\_zn\_new\_0m\_a

---

|                        |                              |                              |              |
|------------------------|------------------------------|------------------------------|--------------|
| Bond precision:        | C-C = 0.0027 Å               | Wavelength=1.54178           |              |
| Cell:                  | a=13.3489(2)                 | b=14.1103(2)                 | c=18.9440(3) |
|                        | alpha=90                     | beta=91.461(1)               | gamma=90     |
| Temperature:           | 100 K                        |                              |              |
|                        | Calculated                   | Reported                     |              |
| Volume                 | 3567.08(9)                   | 3567.08(9)                   |              |
| Space group            | P 21/n                       | P 1 21/n 1                   |              |
| Hall group             | -P 2yn                       | -P 2yn                       |              |
| Moiety formula         | C70 H90 B2 N4 O4 Zn2, C6 H14 | C70 H90 B2 N4 O4 Zn2, C6 H14 |              |
| Sum formula            | C76 H104 B2 N4 O4 Zn2        | C76 H104 B2 N4 O4 Zn2        |              |
| Mr                     | 1290.03                      | 1289.99                      |              |
| Dx, g cm <sup>-3</sup> | 1.201                        | 1.201                        |              |
| Z                      | 2                            | 2                            |              |
| Mu (mm <sup>-1</sup> ) | 1.204                        | 1.204                        |              |
| F000                   | 1380.0                       | 1380.0                       |              |
| F000'                  | 1377.00                      |                              |              |
| h,k,lmax               | 16,17,23                     | 15,17,23                     |              |
| Nref                   | 6771                         | 6712                         |              |
| Tmin,Tmax              | 0.917,0.953                  | 0.672,0.753                  |              |
| Tmin'                  | 0.908                        |                              |              |

Correction method= # Reported T Limits: Tmin=0.672 Tmax=0.753  
AbsCorr = MULTI-SCAN

Data completeness= 0.991      Theta(max)= 70.019

R(reflections)= 0.0336( 6115)

wR2(reflections)=  
0.0909( 6712)

S = 1.057

Npar= 437

---

The following ALERTS were generated. Each ALERT has the format

**test-name\_ALERT\_alert-type\_alert-level.**

Click on the hyperlinks for more details of the test.

---

### Alert level C

PLAT911\_ALERT\_3\_C Missing FCF Refl Between Thmin & STh/L= 0.600 35 Report  
14 0 0, 14 1 0, 15 1 0, 13 2 0, -15 0 1, 15 0 1,  
-15 1 1, -14 1 1, -13 1 1, -15 2 1, -14 2 1, -14 0 2,  
-15 1 2, -14 1 2, -13 1 2, -15 2 2, -13 2 2, -15 0 3,  
-13 0 3, -15 1 3, -14 1 3, -13 1 3, -15 2 3, -14 0 4,  
-15 1 4, -14 1 4, -15 2 4, -14 2 4, -15 0 5, -15 1 5,  
-15 1 6, -15 0 7, -15 1 7, -15 1 8, -13 0 9,

---

### Alert level G

PLAT002\_ALERT\_2\_G Number of Distance or Angle Restraints on AtSite 6 Note  
PLAT003\_ALERT\_2\_G Number of Uiso or U(i,j) Restrained non-H Atoms 6 Report  
PLAT172\_ALERT\_4\_G The CIF-Embedded .res File Contains DFIX Records 1 Report  
PLAT176\_ALERT\_4\_G The CIF-Embedded .res File Contains SADI Records 3 Report  
PLAT178\_ALERT\_4\_G The CIF-Embedded .res File Contains SIMU Records 1 Report  
PLAT188\_ALERT\_3\_G A Non-default SIMU Restraint Value has been used 0.0100 Report  
PLAT191\_ALERT\_3\_G A Non-default SADI Restraint Value has been used 0.0400 Report  
PLAT302\_ALERT\_4\_G Anion/Solvent/Minor-Residue Disorder (Resd 2) 100% Note  
PLAT302\_ALERT\_4\_G Anion/Solvent/Minor-Residue Disorder (Resd 3) 100% Note  
PLAT304\_ALERT\_4\_G Non-Integer Number of Atoms in ..... (Resd 2) 10.70 Check  
PLAT304\_ALERT\_4\_G Non-Integer Number of Atoms in ..... (Resd 3) 9.30 Check  
PLAT395\_ALERT\_2\_G Deviating X-O-Y Angle From 120 for O003 . 107.6 Degree  
PLAT720\_ALERT\_4\_G Number of Unusual/Non-Standard Labels ..... 98 Note  
Zn01 O002 O003 N004 N005 C006 C007 C008  
C009 C00A C00B H00B C00C C00D H00D C00E  
C00F H00F C00G H00A H00C H00E C00H H00H  
C00I H00I C00J C00K C00L H00G H00J H00K  
C00M H00M C00N H00N C00O H00O C00P C00Q  
H00Q C00R H00R C00S H00L H00P H00S C00T  
H00T C00U H00U C00V H00V C00W H00W C00X  
H00X B00Y C00Z H00Y Ha C010 H01A H01B  
H01C C011 H01D H01E H01F C012 H01G H01H  
H01I C013 H01J H01K H01L C014 H01M H01N  
H01O C015 H01P H01Q H01R C016 H01S H01T  
H01U C017 H01V H01W C018 H01X H01Y C0  
HOA HOB  
PLAT773\_ALERT\_2\_G Check long C-C Bond in CIF: C1 --C1 1.75 Ang.  
PLAT860\_ALERT\_3\_G Number of Least-Squares Restraints ..... 64 Note  
PLAT883\_ALERT\_1\_G No Info/Value for \_atom\_sites\_solution\_primary . Please Do !  
PLAT912\_ALERT\_4\_G Missing # of FCF Reflections Above STh/L= 0.600 4 Note  
PLAT933\_ALERT\_2\_G Number of HKL-OMIT Records in Embedded .res File 6 Note  
-14 0 4, -14 1 1, -14 1 2, -14 1 3, -13 0 3, 14 0 0,  
PLAT969\_ALERT\_5\_G The 'Henn et al.' R-Factor-gap value ..... 3.861 Note  
Predicted wR2: Based on SigI\*\*2 2.36 or SHELX Weight 8.60  
PLAT978\_ALERT\_2\_G Number C-C Bonds with Positive Residual Density. 11 Info

---

0 **ALERT level A** = Most likely a serious problem - resolve or explain

0 **ALERT level B** = A potentially serious problem, consider carefully

1 **ALERT level C** = Check. Ensure it is not caused by an omission or oversight

20 **ALERT level G** = General information/check it is not something unexpected

- 1 ALERT type 1 CIF construction/syntax error, inconsistent or missing data
  - 6 ALERT type 2 Indicator that the structure model may be wrong or deficient
  - 4 ALERT type 3 Indicator that the structure quality may be low
  - 9 ALERT type 4 Improvement, methodology, query or suggestion
  - 1 ALERT type 5 Informative message, check
- 

It is advisable to attempt to resolve as many as possible of the alerts in all categories. Often the minor alerts point to easily fixed oversights, errors and omissions in your CIF or refinement strategy, so attention to these fine details can be worthwhile. In order to resolve some of the more serious problems it may be necessary to carry out additional measurements or structure refinements. However, the purpose of your study may justify the reported deviations and the more serious of these should normally be commented upon in the discussion or experimental section of a paper or in the "special\_details" fields of the CIF. checkCIF was carefully designed to identify outliers and unusual parameters, but every test has its limitations and alerts that are not important in a particular case may appear. Conversely, the absence of alerts does not guarantee there are no aspects of the results needing attention. It is up to the individual to critically assess their own results and, if necessary, seek expert advice.

### **Publication of your CIF in IUCr journals**

A basic structural check has been run on your CIF. These basic checks will be run on all CIFs submitted for publication in IUCr journals (*Acta Crystallographica*, *Journal of Applied Crystallography*, *Journal of Synchrotron Radiation*); however, if you intend to submit to *Acta Crystallographica Section C* or *E* or *IUCrData*, you should make sure that full publication checks are run on the final version of your CIF prior to submission.

### **Publication of your CIF in other journals**

Please refer to the *Notes for Authors* of the relevant journal for any special instructions relating to CIF submission.

---

**PLATON version of 22/08/2024; check.def file version of 21/08/2024**

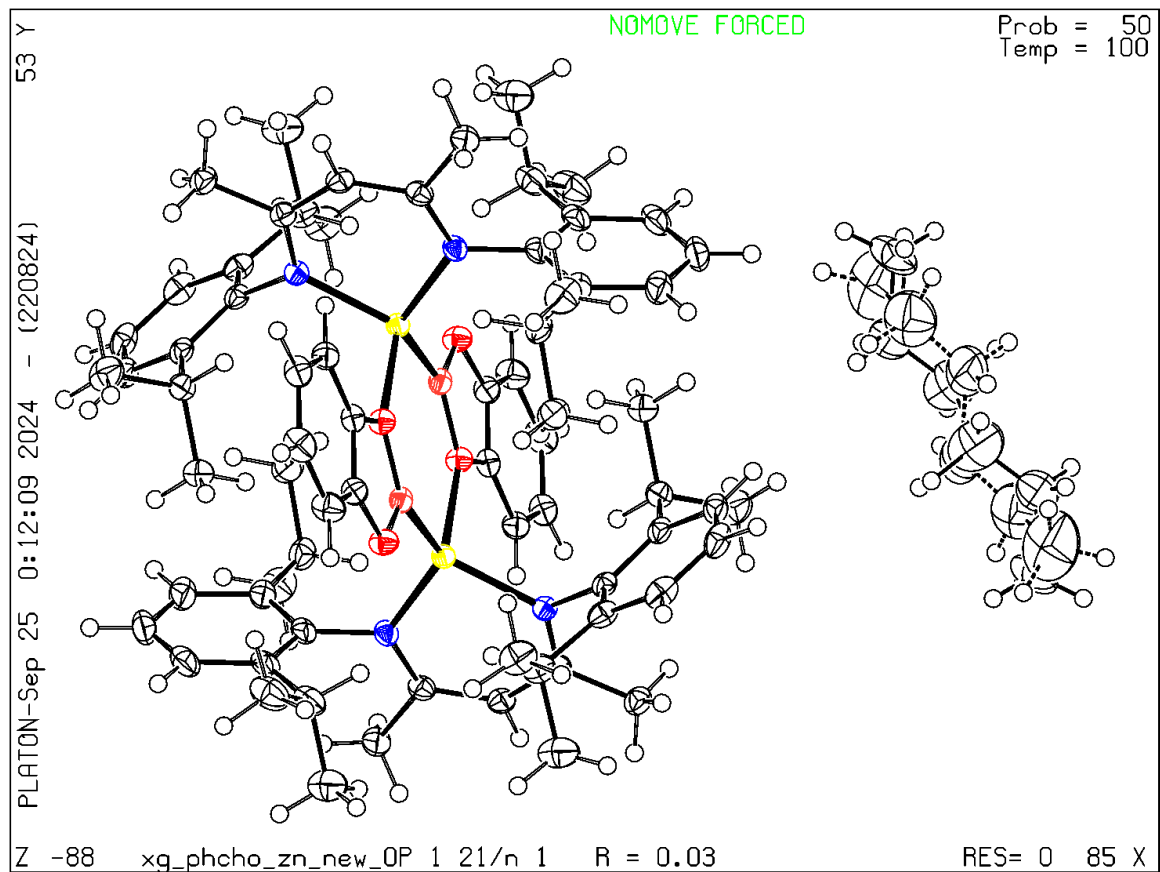

Supplement: Supplementary file 5 [file 6067ca51ca6a0f7682dc3208.pdf]
